# Supplementary material for: Warm Cover – Precursory Strong Signals hidden in the Middle Troposphere for Haze Pollution
Source: Copernicus journal article supplement (doi:10.5194/acp-2020-1140), 2021-01-05
Supplement: Supplementary file 1 [file acp-2020-1140-supplement-version4.zip]

*Supplement of*

## **‘Warm Cover’- Precursory ‘Strong Signals’ hidden in the Middle Troposphere for Haze Pollution**

**Xiangde Xu et al.**

*Correspondence to:* Wenyue Cai (caiwy@cma.gov.cn) and Tianliang Zhao (tlzhao@nuist.edu.cn)

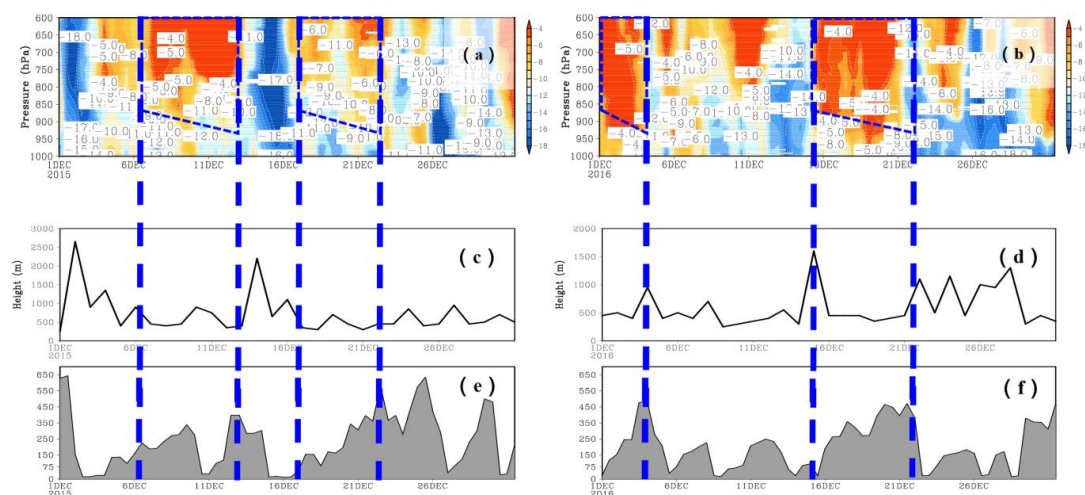

Figure S1. (a, b) Time-vertical cross-sections of air temperature anomalies over Beijing. (c, d) The variation of the height of the atmospheric boundary layer (ABL, units: m) and (e, f) the surface PM<sub>2.5</sub> concentrations over Beijing. Panels (a, c, e) show the event during December 2015, while panels (b, d, f) show the event during December 2016.
