# Supplementary material for: Warm Cover – Precursory Strong Signals hidden in the Middle Troposphere for Haze Pollution
Source: Copernicus journal article supplement (doi:10.5194/acp-2020-1140), 2021-01-05
Supplement: Supplementary file 2 [file acp-2020-1140-supplement.pdf]

Supplement of

## ‘Warm Cover’- Precursory ‘Strong Signals’ hidden in the Middle Troposphere for Haze Pollution

Xiangde Xu et al.

Correspondence to: Wenyue Cai (caiwu@cma.gov.cn) and Tianliang Zhao (tlzhao@nuist.edu.cn)

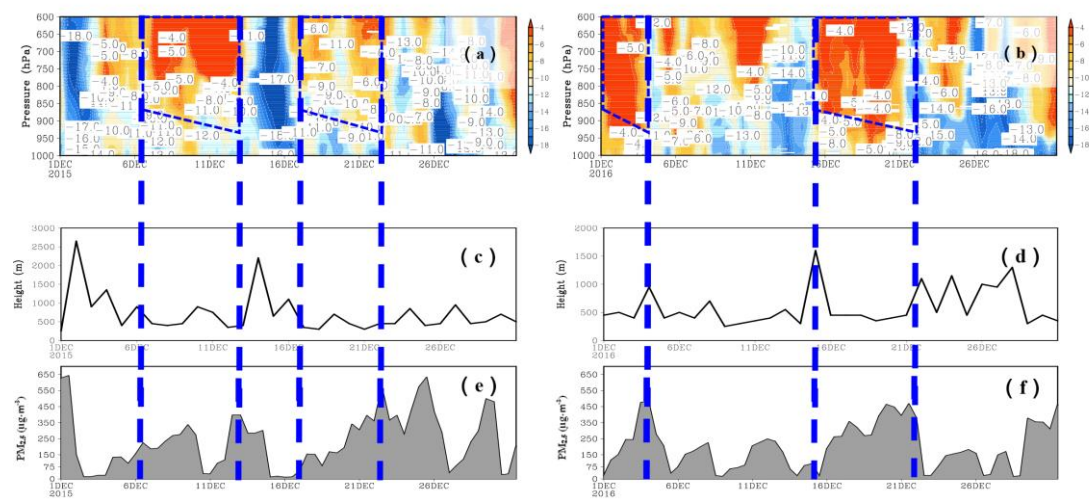

Figure S1. (a, b) Time-vertical cross-sections of air temperature anomalies (unit: °C) over Beijing. (c, d) The variation of the height of the atmospheric boundary layer (ABL, units: m) and (e, f) the surface PM<sub>2.5</sub> concentrations (units: μg·m<sup>-3</sup>) over Beijing. Panels (a, c, e) show the event during December 2015, while panels (b, d, f) show the event during December 2016.
